# Supplementary material for: Intramolecular noncovalent C-bonding driven conformational preference in spiroisatin-based N-acyl hydrazones
Source: Royal Society of Chemistry journal article supplement (doi:10.1039/d4ra08086f), 2025-01-01

# Intramolecular Noncovalent Carbon Bonding Driven Conformational Preference in Spiroisatin-based *N*-Acyl Hydrazones

Muhammad Imran Ali,<sup>a</sup> Javid Hussain,<sup>b</sup> Muhammad Usman Anwar,<sup>b</sup> Ahmed Al-Harrasi<sup>c</sup> and  
Muhammad Moazzam Naseer<sup>a\*</sup>

<sup>a</sup>*Department of Chemistry, Quaid-i-Azam University, Islamabad 45320, Pakistan*

<sup>b</sup>*Department of Biological Sciences & Chemistry, College of Arts and Sciences, University of Nizwa, Nizwa,  
Oman*

<sup>c</sup>*Natural and Medical Sciences Research Centre, University of Nizwa, Birkat Almouz 616, Oman*

\*Corresponding author: [moazzam@qau.edu.pk](mailto:moazzam@qau.edu.pk) (M. M. Naseer)

## Table of Contents

- 1) General Considerations
- 2) Scheme S1: Synthesis of spiroisatin-based *N*-acyl hydrazones **1-3**
- 3) Fig. S1: <sup>1</sup>H & <sup>13</sup>C NMR spectra of compound **2**
- 4) Fig. S2: <sup>1</sup>H & <sup>13</sup>C NMR spectra of compound **3**
- 5) Table S1: Single crystal XRD data collection and refinement details of compounds **1-3**
- 6) Fig. S3: Intermolecular interactions observed in solid state packing of Compounds **3**
- 7) Fig. S4. Two fragments used in the CSD searches A and B, and CSD search results
- 8) Fig. S5. Representative X-ray solid state structures retrieved from the CSD (searches A and B).<sup>1</sup> The CSD references codes are given. Distances in Å.
- 9) Atomic Coordinates of compound **1-3**
- 10) Fig. S6: PES scan of compound **2**
- 11) Fig. S7: PES scan of compound **3**
- 12) Copies of LC-MS Spectra **1-3**

## 1. General Considerations

To proceed with the experiments more precisely all the reactions were performed in completely washed, rinsed, and dried apparatus. All the solvents were freshly dried in specific desiccants. To check the progress of reactions at regular intervals, thin layer chromatography was used using Merck silica gel-60 F<sub>254</sub> 0.2mm pre-coated aluminium plates. 254 nm wavelength of U.V. lamp was used to visualize the U.V. active compounds. IR spectroscopy was used for the characterization of different functional groups in the synthesized compounds. IR spectra were recorded using Bruker Transor-II FT-IR spectrophotometer, and absorption frequencies were reported in per centimetres (cm<sup>-1</sup>) units. <sup>1</sup>H NMR and <sup>13</sup>C NMR spectra were recorded on a Bruker Advance 300 MHz and 75 MHz spectrophotometer, respectively. Chemical shift ( $\delta$ ) values were reported in ppm units and coupling constants in Hertz (Hz). Mass of all the compounds were verified using LC-MS Agilent 6310 Ion Trap in Isocratic, Negative Mode ACN. Melting points of synthesized compounds were recorded using Gallenkamp melting point instrument MPD350.BM3.5 (UK).

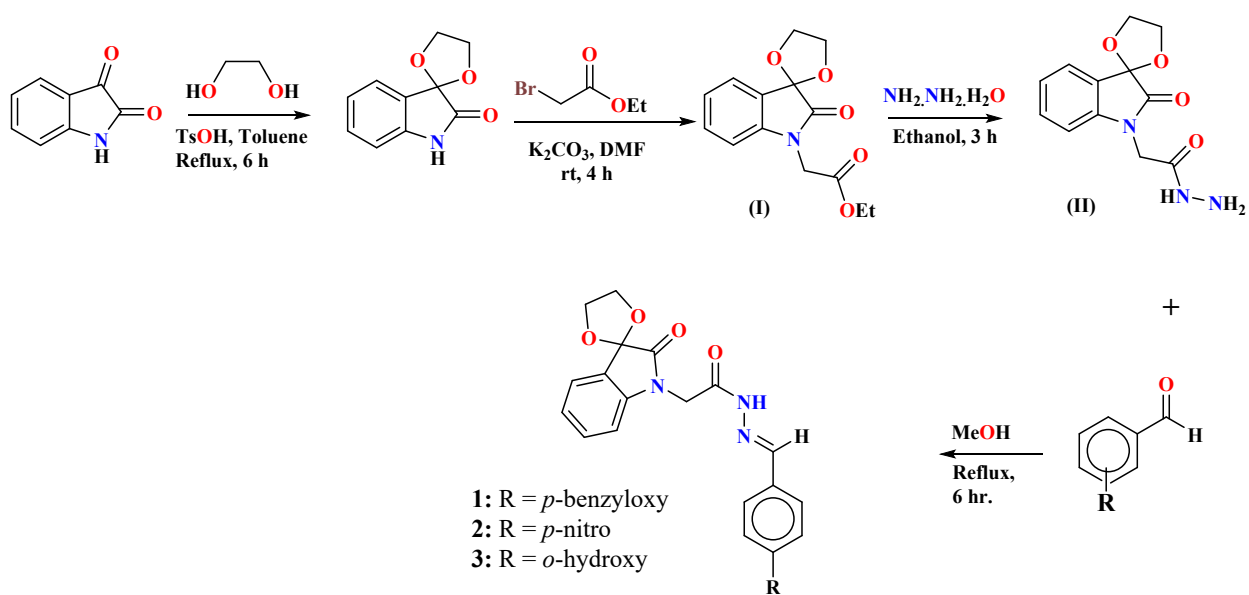

**Scheme S1:** Synthesis of spiroisatin-based *N*-acyl hydrazones **1-3**

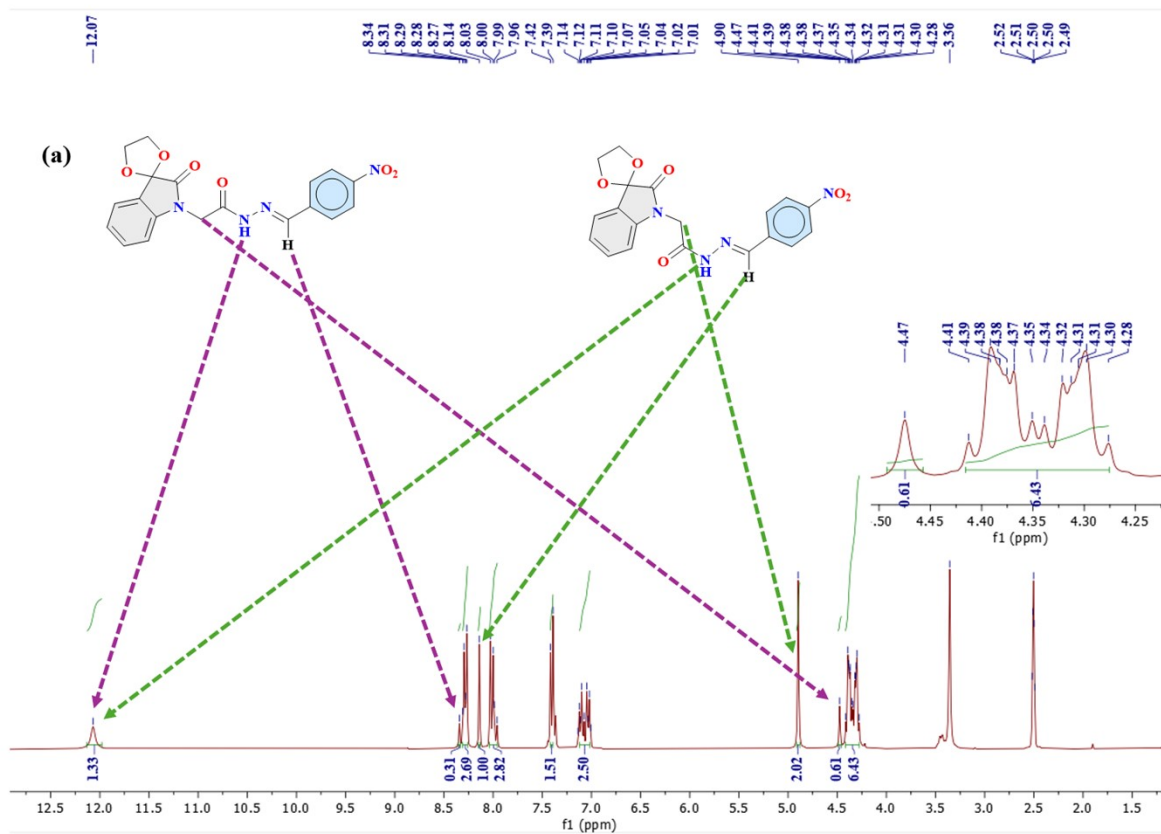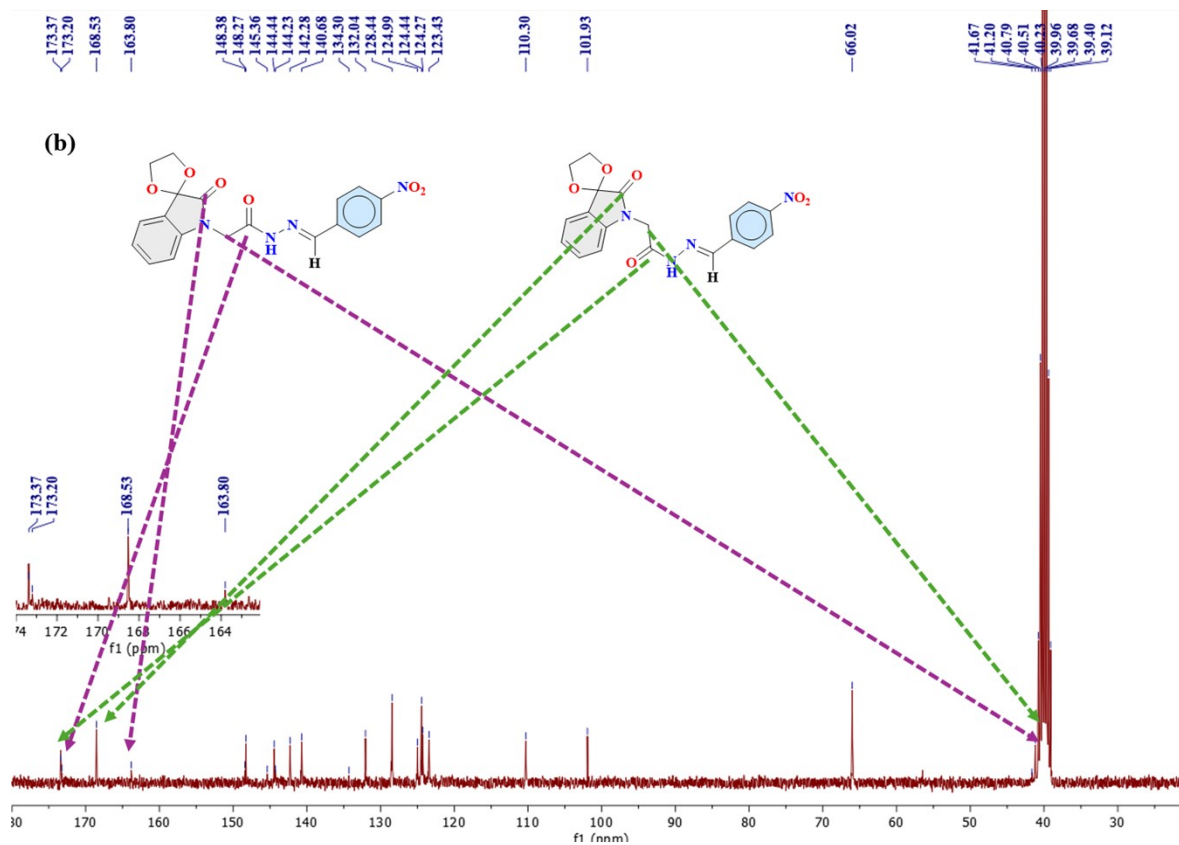

**Fig. S1:**  $^1\text{H}$  &  $^{13}\text{C}$  NMR spectra of compound 2

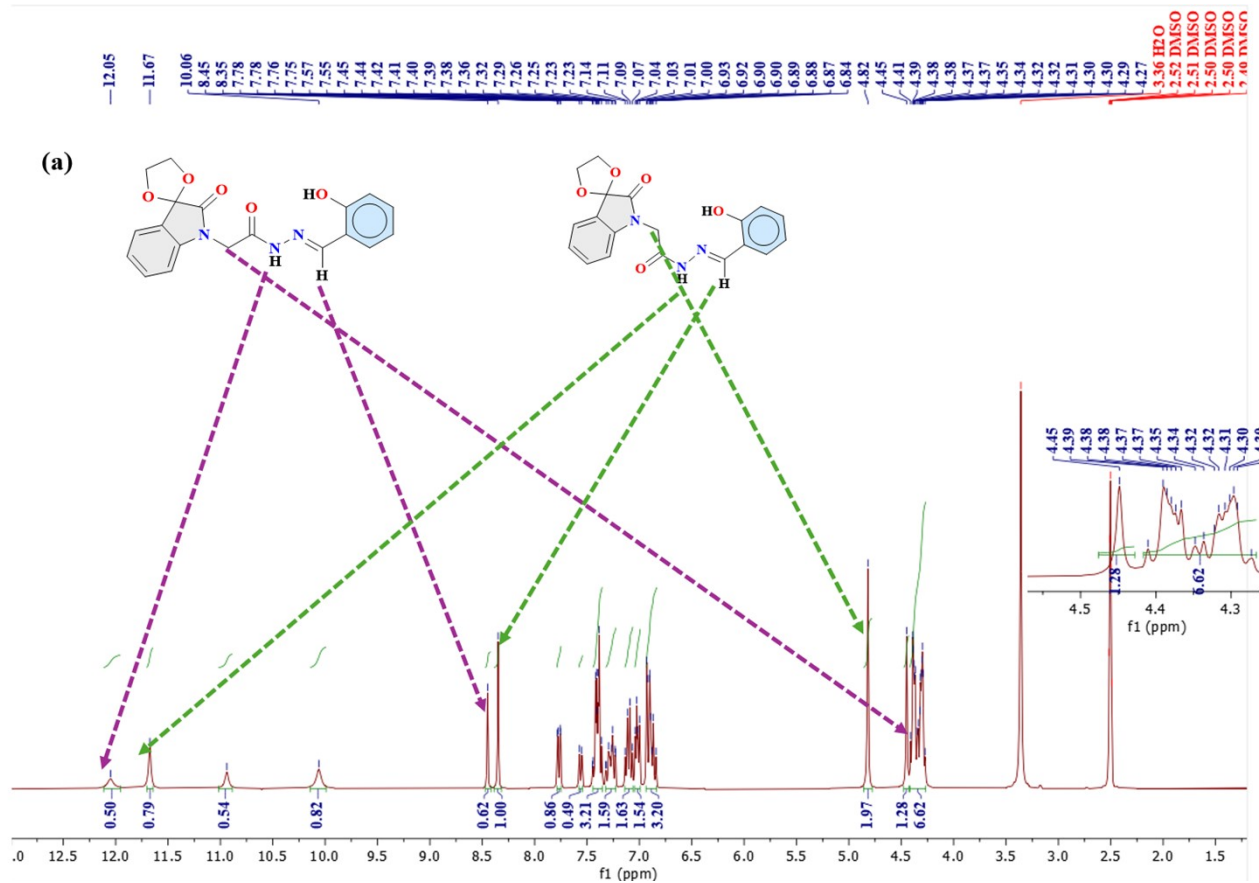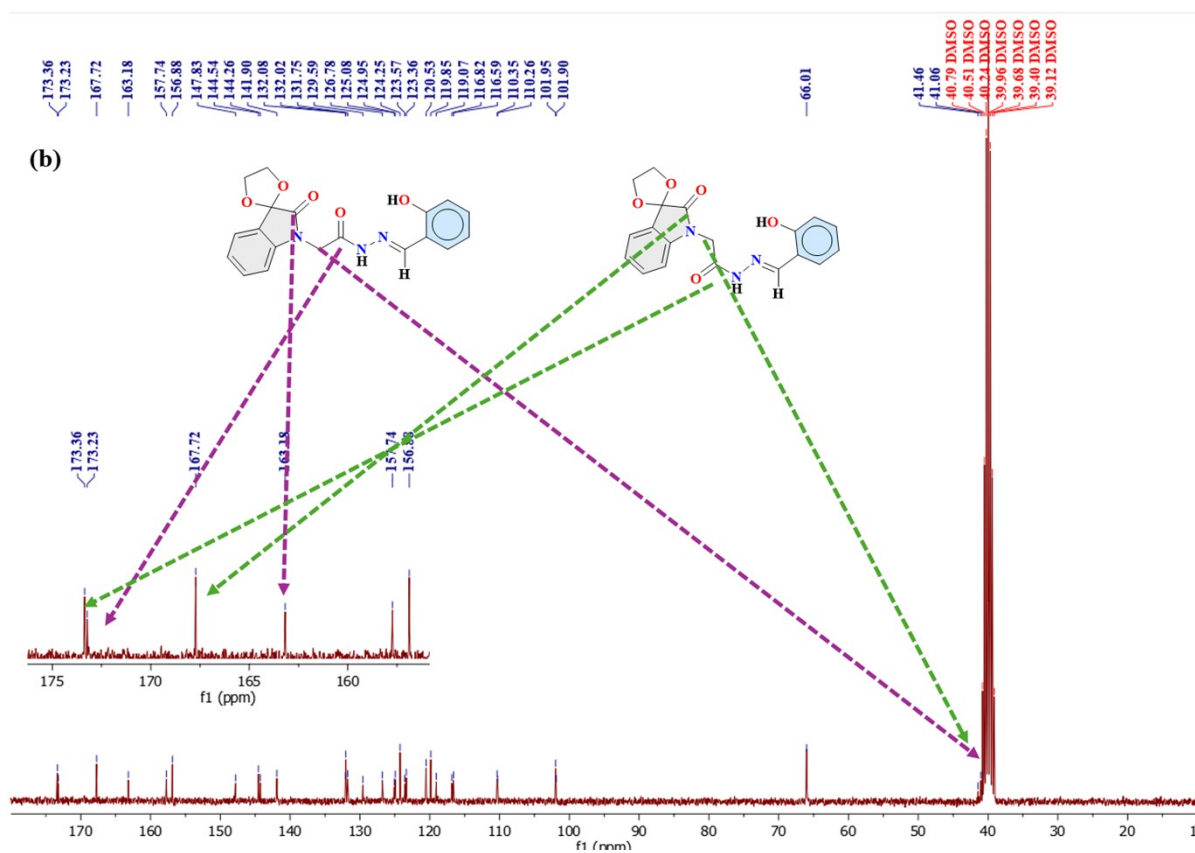

Fig. S2:  $^1\text{H}$  &  $^{13}\text{C}$  NMR spectra of compound 3

**Table S1:** Single crystal XRD data collection and refinement details of compounds **1-3**

| Parameters                                        | Compounds                                                           |                                                               |                                                               |
|---------------------------------------------------|---------------------------------------------------------------------|---------------------------------------------------------------|---------------------------------------------------------------|
|                                                   | 1                                                                   | 2                                                             | 3                                                             |
| <b>Empirical formula</b>                          | C <sub>26</sub> H <sub>23.57</sub> N <sub>3</sub> O <sub>5.29</sub> | C <sub>19</sub> H <sub>16</sub> N <sub>4</sub> O <sub>6</sub> | C <sub>19</sub> H <sub>17</sub> N <sub>3</sub> O <sub>5</sub> |
| <b>Formula weight</b>                             | 462.63                                                              | 396.36                                                        | 367.35                                                        |
| <b>Temperature/K</b>                              | 296(2)                                                              | 296(2)                                                        | 296(2)                                                        |
| <b>Crystal system</b>                             | Monoclinic                                                          | Orthorhombic                                                  | Monoclinic                                                    |
| <b>Space group</b>                                | P2 <sub>1</sub> /c                                                  | Pbca                                                          | P2 <sub>1</sub> /c                                            |
| <b>a/Å</b>                                        | 6.1137 (5)                                                          | 11.3756(9)                                                    | 12.995(3)                                                     |
| <b>b/Å</b>                                        | 24.053 (2)                                                          | 15.4485(10)                                                   | 14.110(3)                                                     |
| <b>c/Å</b>                                        | 15.7613 (12)                                                        | 20.4842(17)                                                   | 9.660(3)                                                      |
| <b>α/°</b>                                        | 90                                                                  | 90                                                            | 90                                                            |
| <b>β/°</b>                                        | 92.357(3)                                                           | 90                                                            | 101.684(17)                                                   |
| <b>γ/°</b>                                        | 90                                                                  | 90                                                            | 90                                                            |
| <b>Volume/Å<sup>3</sup></b>                       | 2315.8(3)                                                           | 3599.8(5)                                                     | 1734.6(8)                                                     |
| <b>Z</b>                                          | 4                                                                   | 8                                                             | 4                                                             |
| <b>ρ<sub>calc</sub>/cm<sup>3</sup></b>            | 1.327                                                               | 1.463                                                         | 1.407                                                         |
| <b>μ/mm<sup>-1</sup></b>                          | 0.094                                                               | 0.112                                                         | 0.104                                                         |
| <b>F(000)</b>                                     | 971.0                                                               | 1648.0                                                        | 768.0                                                         |
| <b>Crystal size/mm<sup>3</sup></b>                | 0.39 × 0.337 × 0.07                                                 | ? × ? × ?                                                     | ? × ? × ?                                                     |
| <b>Radiation</b>                                  | MoKα (λ = 0.71073)                                                  | MoKα (λ = 0.71073)                                            | MoKα (λ = 0.71073)                                            |
| <b>2θ range for data collection/°</b>             | 6.882 to 50                                                         | 5.966 to 49.526                                               | 6.404 to 50.02                                                |
| <b>Index ranges</b>                               | -7 ≤ h ≤ 6, -28 ≤ k ≤ 28, -18 ≤ l ≤ 18                              | -13 ≤ h ≤ 13, -16 ≤ k ≤ 18, -24 ≤ l ≤ 24                      | -15 ≤ h ≤ 15, -16 ≤ k ≤ 16, -11 ≤ l ≤ 11                      |
| <b>Reflections collected</b>                      | 19171                                                               | 40930                                                         | 30719                                                         |
| <b>Independent reflections</b>                    | 4067 [R <sub>int</sub> = 0.0427, R <sub>sigma</sub> = 0.0321]       | 3080 [R <sub>int</sub> = 0.0721, R <sub>sigma</sub> = 0.0266] | 3026 [R <sub>int</sub> = 0.0766, R <sub>sigma</sub> = 0.0338] |
| <b>Data/restraints/parameters</b>                 | 4067/109/363                                                        | 3080/1/265                                                    | 3026/1/247                                                    |
| <b>Goodness-of-fit on F<sup>2</sup></b>           | 1.071                                                               | 1.116                                                         | 1.112                                                         |
| <b>Final R indexes [I ≥ 2σ (I)]</b>               | R <sub>1</sub> = 0.0452, wR <sub>2</sub> = 0.1015                   | R <sub>1</sub> = 0.0478, wR <sub>2</sub> = 0.1030             | R <sub>1</sub> = 0.0557, wR <sub>2</sub> = 0.1115             |
| <b>Final R indexes [all data]</b>                 | R <sub>1</sub> = 0.0692, wR <sub>2</sub> = 0.1165                   | R <sub>1</sub> = 0.0690, wR <sub>2</sub> = 0.1187             | R <sub>1</sub> = 0.0958, wR <sub>2</sub> = 0.1363             |
| <b>Largest diff. peak/hole / e Å<sup>-3</sup></b> | 0.15/-0.19                                                          | 0.20/-0.21                                                    | 0.17/-0.19                                                    |

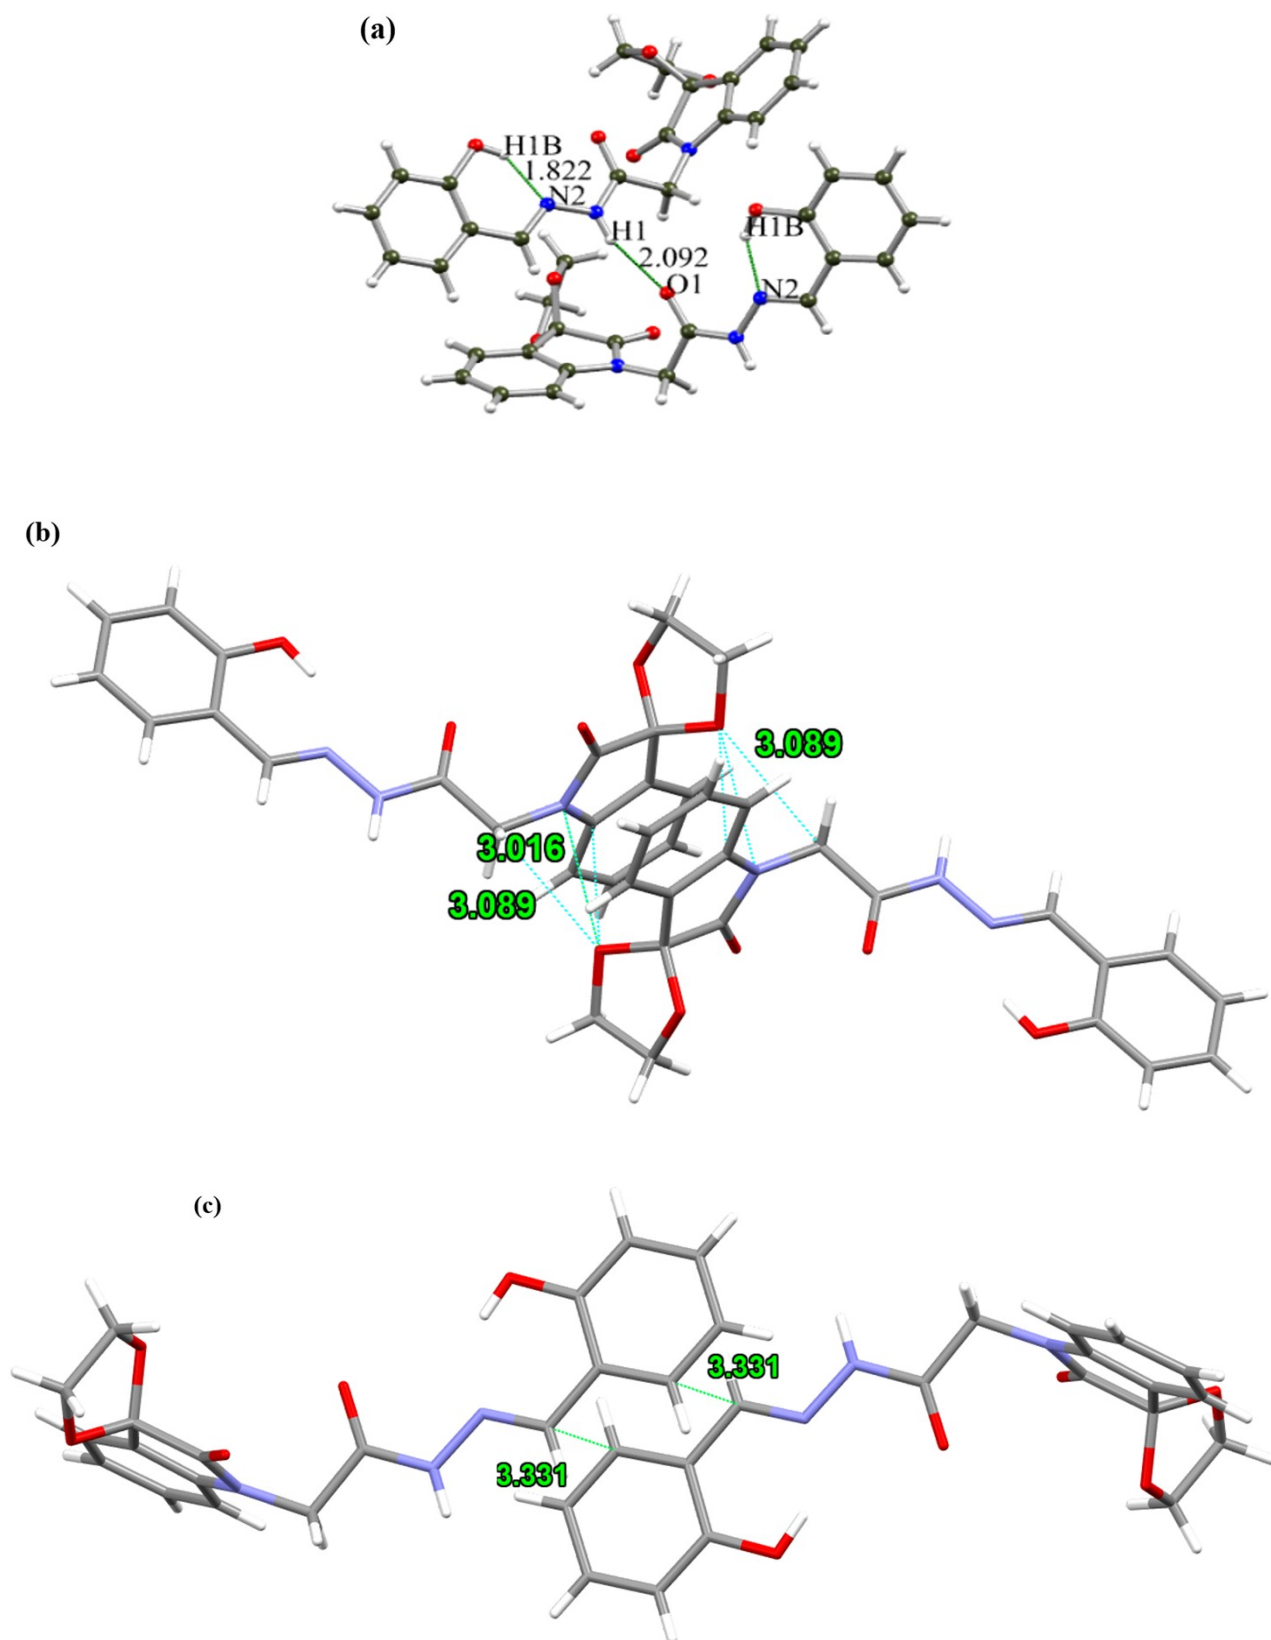

**Fig. S3:** Intermolecular interactions observed in solid state packing of compounds **3**, **a**) Showing  $\text{NH}\cdots\text{O}$  [ $\text{N}(1)\text{-H}(1)\cdots\text{O}(1)$  2.092 Å]; **b**) showing self-complementary intramolecular C-bond [ $\text{C}(9)\cdots\text{O}(5)$  3.089 Å] &  $\text{O}\cdots\text{N}$  [ $\text{C}(5)\cdots\text{N}(3)$  3.089 Å] contacts; **c**) showing  $\pi\cdots\pi$  contacts [ $\text{C}(2)\cdots\text{C}(8)$  3.331 Å]

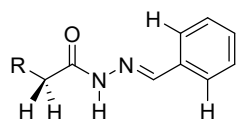

Search A  
20 hits  
4 *trans*, 16 *cis*

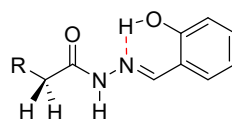

Search B  
20 Hits  
16 *trans*, 4 *cis*

| SEARCH A | SEARCH B |
|----------|----------|
| CIKSAR   | ASOJEZ   |
| ECESUC   | IWEDIZ   |
| EDUWEG   | ABAJUK   |
| HUYTIG   | AXAFAH   |
| MEWMUY   | DOVTUF   |
| MIHTOO   | FOVYIZ   |
| MUXTIK   | HOFNEW   |
| OFEFUB   | HOFNEW01 |
| PECVEA   | KETTEJ   |
| QAKPOJ   | LAPYIM   |
| QUYDAQ   | LOFZUD   |
| QUZCEU   | MIMVIO   |
| TUGNED   | MIXXIB   |
| VIKHAZ   | PIHSOQ   |
| XATKEK   | SEDVII   |
| XAZTAV   | TICDUF   |
| XAFWAF   | UDUQIU   |
| YAFXUA   | WAKKAX   |
| EYEKOK   | YAHBIU   |
| UZEVOM   | YUPSEJ   |

**Fig. S4.** Two fragments used in the CSD searches A and B<sup>1</sup>, and CSD search results<sup>1</sup>

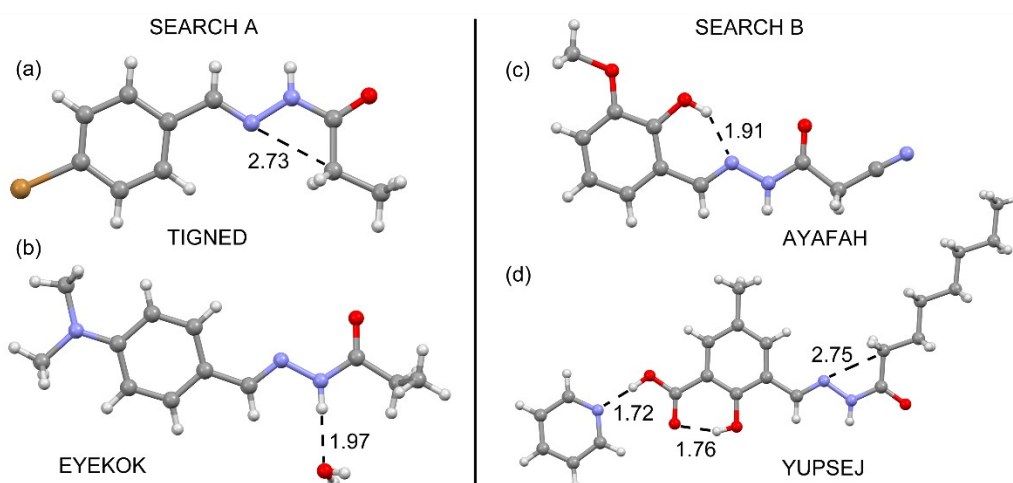

**Fig. S5.** Representative X-ray solid state structures retrieved from the CSD (searches A and B).<sup>1</sup> The CSD references codes are given. Distances in Å.

## Atomic Coordinates:

### Compound 1 (*cis*)

| Center<br>Number | Atomic<br>Number | Atomic<br>Type | Coordinates (Angstroms) |           |           |
|------------------|------------------|----------------|-------------------------|-----------|-----------|
|                  |                  |                | X                       | Y         | Z         |
| 1                | 6                | 0              | 6.017881                | 0.856179  | -0.278951 |
| 2                | 6                | 0              | 4.669753                | 1.183170  | -0.184571 |
| 3                | 6                | 0              | 4.258093                | 2.493897  | -0.195662 |
| 4                | 6                | 0              | 5.235065                | 3.480630  | -0.304656 |
| 5                | 6                | 0              | 6.577828                | 3.160838  | -0.399314 |
| 6                | 6                | 0              | 6.977372                | 1.826920  | -0.385404 |
| 7                | 1                | 0              | 3.224898                | 2.760685  | -0.119958 |
| 8                | 1                | 0              | 4.933300                | 4.508878  | -0.314006 |
| 9                | 1                | 0              | 7.309560                | 3.938143  | -0.481808 |
| 10               | 1                | 0              | 8.013593                | 1.563795  | -0.457151 |
| 11               | 6                | 0              | 6.150647                | -0.631346 | -0.231520 |
| 12               | 8                | 0              | 6.718443                | -1.184244 | -1.410656 |
| 13               | 6                | 0              | 7.340011                | -2.453031 | -1.032648 |
| 14               | 6                | 0              | 7.858820                | -2.142001 | 0.376412  |
| 15               | 1                | 0              | 6.591716                | -3.227296 | -1.016862 |
| 16               | 1                | 0              | 8.116324                | -2.666128 | -1.745227 |
| 17               | 1                | 0              | 7.823387                | -2.989605 | 1.037722  |
| 18               | 1                | 0              | 8.846363                | -1.711729 | 0.353052  |
| 19               | 6                | 0              | 4.688582                | -1.100825 | -0.081306 |
| 20               | 8                | 0              | 4.304387                | -2.245887 | 0.011367  |
| 21               | 6                | 0              | 2.469094                | -0.053628 | 0.094295  |
| 22               | 1                | 0              | 2.112027                | -0.999958 | -0.284078 |
| 23               | 1                | 0              | 1.972765                | 0.733479  | -0.449638 |
| 24               | 6                | 0              | -1.338968               | 0.006861  | 1.160633  |
| 25               | 6                | 0              | -2.378386               | -0.041926 | 0.120447  |
| 26               | 6                | 0              | -3.707294               | -0.023430 | 0.498148  |
| 27               | 6                | 0              | -2.050903               | -0.106693 | -1.231717 |
| 28               | 6                | 0              | -4.682020               | -0.070084 | -0.476608 |
| 29               | 6                | 0              | -3.041714               | -0.152431 | -2.192564 |
| 30               | 1                | 0              | -1.019428               | -0.120855 | -1.515626 |
| 31               | 6                | 0              | -4.372933               | -0.134405 | -1.817712 |
| 32               | 1                | 0              | -2.783545               | -0.202033 | -3.229663 |
| 33               | 1                | 0              | -5.156768               | -0.169117 | -2.540792 |
| 34               | 6                | 0              | 2.145782                | 0.036108  | 1.580610  |
| 35               | 8                | 0              | 3.001688                | 0.086058  | 2.444383  |
| 36               | 8                | 0              | 6.916215                | -1.132025 | 0.861883  |
| 37               | 7                | 0              | 3.895773                | 0.011436  | -0.100500 |
| 38               | 7                | 0              | 0.824034                | 0.044033  | 1.882580  |
| 39               | 1                | 0              | 0.533792                | 0.090967  | 2.841817  |
| 40               | 7                | 0              | -0.114901               | -0.003760 | 0.858921  |
| 41               | 1                | 0              | -3.994168               | 0.026000  | 1.525812  |
| 42               | 1                | 0              | -1.683605               | 0.051048  | 2.179838  |
| 43               | 6                | 0              | -6.970926               | -0.098024 | -1.001763 |
| 44               | 1                | 0              | -6.859079               | 0.744974  | -1.651181 |
| 45               | 1                | 0              | -6.856211               | -1.000224 | -1.565479 |
| 46               | 6                | 0              | -8.370049               | -0.068756 | -0.358956 |
| 47               | 6                | 0              | -9.006167               | 1.150866  | -0.127822 |
| 48               | 6                | 0              | -9.001526               | -1.262353 | -0.008283 |
| 49               | 6                | 0              | -10.273794              | 1.177139  | 0.454332  |
| 50               | 1                | 0              | -8.508658               | 2.091654  | -0.404490 |
| 51               | 6                | 0              | -10.268649              | -1.236143 | 0.574170  |
| 52               | 1                | 0              | -8.499906               | -2.223841 | -0.191017 |
| 53               | 6                | 0              | -10.904800              | -0.015959 | 0.805860  |
| 54               | 1                | 0              | -10.774706              | 2.138864  | 0.637127  |
| 55               | 1                | 0              | -10.766395              | -2.176731 | 0.851368  |
| 56               | 1                | 0              | -11.903692              | 0.004699  | 1.265299  |
| 57               | 8                | 0              | -6.069571               | -0.051036 | -0.075074 |



## Compound 1 (*trans*)

| Center Number | Atomic Number | Atomic Type | Coordinates (Angstroms) |           |           |
|---------------|---------------|-------------|-------------------------|-----------|-----------|
|               |               |             | X                       | Y         | Z         |
| 1             | 6             | 0           | 6.144361                | 0.925560  | -0.032056 |
| 2             | 6             | 0           | 4.868803                | 1.253907  | -0.476529 |
| 3             | 6             | 0           | 4.407285                | 2.546078  | -0.411715 |
| 4             | 6             | 0           | 5.260022                | 3.513897  | 0.113758  |
| 5             | 6             | 0           | 6.530658                | 3.193219  | 0.557446  |
| 6             | 6             | 0           | 6.981407                | 1.877656  | 0.484911  |
| 7             | 1             | 0           | 3.426861                | 2.812380  | -0.746974 |
| 8             | 1             | 0           | 4.917985                | 4.527679  | 0.173411  |
| 9             | 1             | 0           | 7.166947                | 3.955815  | 0.957412  |
| 10            | 1             | 0           | 7.962875                | 1.614368  | 0.824767  |
| 11            | 6             | 0           | 6.353227                | -0.541597 | -0.223941 |
| 12            | 8             | 0           | 7.416302                | -0.846790 | -1.115011 |
| 13            | 6             | 0           | 7.907146                | -2.177585 | -0.758023 |
| 14            | 6             | 0           | 7.734939                | -2.178872 | 0.765736  |
| 15            | 1             | 0           | 7.289155                | -2.924493 | -1.226912 |
| 16            | 1             | 0           | 8.930172                | -2.249804 | -1.080491 |
| 17            | 1             | 0           | 7.478992                | -3.145358 | 1.162530  |
| 18            | 1             | 0           | 8.597965                | -1.772170 | 1.266307  |
| 19            | 6             | 0           | 5.010875                | -1.002912 | -0.829207 |
| 20            | 8             | 0           | 4.711114                | -2.132347 | -1.146670 |
| 21            | 6             | 0           | 2.866108                | 0.032984  | -1.445328 |
| 22            | 1             | 0           | 2.773727                | -0.852087 | -2.060662 |
| 23            | 1             | 0           | 2.627553                | 0.897972  | -2.047801 |
| 24            | 6             | 0           | -1.608720               | -0.096248 | -0.098908 |
| 25            | 6             | 0           | -2.715249               | -0.227613 | 0.863409  |
| 26            | 6             | 0           | -4.017696               | -0.144494 | 0.410093  |
| 27            | 6             | 0           | -2.473832               | -0.431263 | 2.220025  |
| 28            | 6             | 0           | -5.051728               | -0.264722 | 1.315406  |
| 29            | 6             | 0           | -3.522805               | -0.549776 | 3.110282  |
| 30            | 1             | 0           | -1.461827               | -0.494197 | 2.561424  |
| 31            | 6             | 0           | -4.827819               | -0.466259 | 2.659775  |
| 32            | 1             | 0           | -3.330113               | -0.706147 | 4.151039  |
| 33            | 1             | 0           | -5.655426               | -0.553913 | 3.327433  |
| 34            | 6             | 0           | 1.892479                | -0.089369 | -0.274480 |
| 35            | 8             | 0           | 2.254305                | -0.242343 | 0.872485  |
| 36            | 8             | 0           | 6.601248                | -1.275091 | 0.972550  |
| 37            | 7             | 0           | 4.222756                | 0.105410  | -0.971154 |
| 38            | 7             | 0           | 0.594774                | -0.024610 | -0.671003 |
| 39            | 1             | 0           | 0.341931                | 0.106964  | -1.631895 |
| 40            | 7             | 0           | -0.408615               | -0.159029 | 0.283966  |
| 41            | 1             | 0           | -4.240326               | 0.011222  | -0.622919 |
| 42            | 1             | 0           | -1.886172               | 0.055506  | -1.128518 |
| 43            | 6             | 0           | -6.596718               | 0.013270  | -0.430906 |
| 44            | 1             | 0           | -6.138634               | 0.934275  | -0.725538 |
| 45            | 1             | 0           | -6.158753               | -0.794377 | -0.979352 |
| 46            | 6             | 0           | -8.107142               | 0.074039  | -0.725057 |
| 47            | 6             | 0           | -8.777628               | 1.296383  | -0.681810 |
| 48            | 6             | 0           | -8.804749               | -1.093640 | -1.035350 |
| 49            | 6             | 0           | -10.145953              | 1.351240  | -0.948551 |
| 50            | 1             | 0           | -8.227798               | 2.216808  | -0.437578 |
| 51            | 6             | 0           | -10.172839              | -1.038942 | -1.301573 |
| 52            | 1             | 0           | -8.275755               | -2.057204 | -1.069778 |
| 53            | 6             | 0           | -10.843686              | 0.183868  | -1.257798 |
| 54            | 1             | 0           | -10.674412              | 2.314958  | -0.913620 |
| 55            | 1             | 0           | -10.723175              | -1.959231 | -1.545484 |
| 56            | 1             | 0           | -11.922338              | 0.226938  | -1.467443 |
| 57            | 8             | 0           | -6.411259               | -0.174823 | 0.835438  |

## Compound 2 (*cis*)

| Center<br>Number | Atomic<br>Number | Atomic<br>Type | Coordinates (Angstroms) |           |           |
|------------------|------------------|----------------|-------------------------|-----------|-----------|
|                  |                  |                | X                       | Y         | Z         |
| 1                | 6                | 0              | 4.297339                | 0.861556  | -0.342757 |
| 2                | 6                | 0              | 2.948770                | 1.183991  | -0.239430 |
| 3                | 6                | 0              | 2.530804                | 2.492439  | -0.268729 |
| 4                | 6                | 0              | 3.501855                | 3.481573  | -0.405370 |
| 5                | 6                | 0              | 4.845022                | 3.166306  | -0.509042 |
| 6                | 6                | 0              | 5.251014                | 1.834664  | -0.476391 |
| 7                | 1                | 0              | 1.497231                | 2.755792  | -0.186449 |
| 8                | 1                | 0              | 3.195134                | 4.508119  | -0.429234 |
| 9                | 1                | 0              | 5.572129                | 3.945387  | -0.612905 |
| 10               | 1                | 0              | 6.287639                | 1.575056  | -0.554812 |
| 11               | 6                | 0              | 4.437660                | -0.624302 | -0.271042 |
| 12               | 8                | 0              | 4.995343                | -1.194984 | -1.446525 |
| 13               | 6                | 0              | 5.626955                | -2.454177 | -1.053388 |
| 14               | 6                | 0              | 6.159424                | -2.116385 | 0.344370  |
| 15               | 1                | 0              | 4.882553                | -3.231452 | -1.016092 |
| 16               | 1                | 0              | 6.396552                | -2.676068 | -1.770552 |
| 17               | 1                | 0              | 6.135134                | -2.952539 | 1.020590  |
| 18               | 1                | 0              | 7.144608                | -1.682090 | 0.302858  |
| 19               | 6                | 0              | 2.979540                | -1.097759 | -0.096875 |
| 20               | 8                | 0              | 2.601800                | -2.242778 | 0.019756  |
| 21               | 6                | 0              | 0.757132                | -0.057793 | 0.084648  |
| 22               | 1                | 0              | 0.400502                | -1.012162 | -0.273400 |
| 23               | 1                | 0              | 0.251247                | 0.717489  | -0.467405 |
| 24               | 6                | 0              | -3.039472               | 0.003844  | 1.191027  |
| 25               | 6                | 0              | -4.089787               | -0.067719 | 0.163177  |
| 26               | 6                | 0              | -5.414624               | -0.048725 | 0.554896  |
| 27               | 6                | 0              | -3.776579               | -0.154445 | -1.191137 |
| 28               | 6                | 0              | -6.399556               | -0.116724 | -0.408276 |
| 29               | 6                | 0              | -4.777450               | -0.221360 | -2.140243 |
| 30               | 1                | 0              | -2.748165               | -0.168832 | -1.485930 |
| 31               | 6                | 0              | -6.104626               | -0.202896 | -1.751341 |
| 32               | 1                | 0              | -4.530230               | -0.287773 | -3.179069 |
| 33               | 1                | 0              | -6.896028               | -0.253719 | -2.465166 |
| 34               | 6                | 0              | 0.449420                | 0.056245  | 1.572608  |
| 35               | 8                | 0              | 1.314330                | 0.125073  | 2.426052  |
| 36               | 8                | 0              | 5.217323                | -1.102441 | 0.822491  |
| 37               | 7                | 0              | 2.181306                | 0.010380  | -0.126709 |
| 38               | 7                | 0              | -0.869023               | 0.063389  | 1.888716  |
| 39               | 1                | 0              | -1.149139               | 0.125636  | 2.850089  |
| 40               | 7                | 0              | -1.818688               | -0.006435 | 0.876283  |
| 41               | 1                | 0              | -5.690647               | 0.017222  | 1.584602  |
| 42               | 1                | 0              | -3.373321               | 0.064138  | 2.212993  |
| 43               | 7                | 0              | -7.782779               | -0.097032 | 0.007897  |
| 44               | 8                | 0              | -8.659810               | -0.161689 | -0.873811 |
| 45               | 8                | 0              | -8.024981               | -0.016471 | 1.227832  |

## Compound 2 (*trans*)

| Center<br>Number | Atomic<br>Number | Atomic<br>Type | Coordinates (Angstroms) |           |           |
|------------------|------------------|----------------|-------------------------|-----------|-----------|
|                  |                  |                | X                       | Y         | Z         |
| 1                | 6                | 0              | 4.523378                | 0.892755  | 0.216674  |
| 2                | 6                | 0              | 3.316237                | 1.222715  | -0.388596 |
| 3                | 6                | 0              | 2.872438                | 2.522290  | -0.421027 |
| 4                | 6                | 0              | 3.672316                | 3.495933  | 0.172411  |
| 5                | 6                | 0              | 4.874798                | 3.173676  | 0.776065  |
| 6                | 6                | 0              | 5.308435                | 1.850606  | 0.800280  |
| 7                | 1                | 0              | 1.944073                | 2.790036  | -0.880371 |
| 8                | 1                | 0              | 3.342975                | 4.515557  | 0.158119  |
| 9                | 1                | 0              | 5.471390                | 3.940857  | 1.225397  |
| 10               | 1                | 0              | 6.237334                | 1.586012  | 1.264215  |
| 11               | 6                | 0              | 4.728660                | -0.582643 | 0.098121  |
| 12               | 8                | 0              | 5.885684                | -0.931571 | -0.648085 |
| 13               | 6                | 0              | 6.307273                | -2.255950 | -0.192381 |
| 14               | 6                | 0              | 5.953312                | -2.203743 | 1.298755  |
| 15               | 1                | 0              | 5.737388                | -3.010010 | -0.708390 |
| 16               | 1                | 0              | 7.360237                | -2.352413 | -0.386661 |
| 17               | 1                | 0              | 5.635074                | -3.152894 | 1.692311  |
| 18               | 1                | 0              | 6.756799                | -1.791823 | 1.886565  |
| 19               | 6                | 0              | 3.461028                | -1.046359 | -0.649636 |
| 20               | 8                | 0              | 3.182295                | -2.181789 | -0.964863 |
| 21               | 6                | 0              | 1.423809                | -0.003654 | -1.552532 |
| 22               | 1                | 0              | 1.390879                | -0.907621 | -2.146065 |
| 23               | 1                | 0              | 1.274164                | 0.843651  | -2.206571 |
| 24               | 6                | 0              | -3.181885               | -0.028705 | -0.752167 |
| 25               | 6                | 0              | -4.398062               | -0.113083 | 0.073369  |
| 26               | 6                | 0              | -5.635025               | -0.028136 | -0.536121 |
| 27               | 6                | 0              | -4.324840               | -0.274165 | 1.454982  |
| 28               | 6                | 0              | -6.772204               | -0.104254 | 0.241245  |
| 29               | 6                | 0              | -5.475013               | -0.348880 | 2.215553  |
| 30               | 1                | 0              | -3.362388               | -0.338885 | 1.917761  |
| 31               | 6                | 0              | -6.714854               | -0.263406 | 1.608527  |
| 32               | 1                | 0              | -5.411412               | -0.472691 | 3.276393  |
| 33               | 1                | 0              | -7.618033               | -0.317676 | 2.173953  |
| 34               | 6                | 0              | 0.314660                | -0.073764 | -0.504353 |
| 35               | 8                | 0              | 0.533447                | -0.192834 | 0.682155  |
| 36               | 8                | 0              | 4.818609                | -1.278694 | 1.338500  |
| 37               | 7                | 0              | 2.714728                | 0.066830  | -0.920756 |
| 38               | 7                | 0              | -0.924731               | -0.005317 | -1.056338 |
| 39               | 1                | 0              | -1.058054               | 0.097191  | -2.044403 |
| 40               | 7                | 0              | -2.037699               | -0.094351 | -0.225558 |
| 41               | 1                | 0              | -5.729284               | 0.095675  | -1.592866 |
| 42               | 1                | 0              | -3.331036               | 0.091982  | -1.812022 |
| 43               | 7                | 0              | -8.062512               | -0.012677 | -0.401789 |
| 44               | 8                | 0              | -9.079209               | -0.080594 | 0.314339  |
| 45               | 8                | 0              | -8.090247               | 0.129762  | -1.639708 |

### Compound 3 (*cis*)

| Center<br>Number | Atomic<br>Number | Atomic<br>Type | Coordinates (Angstroms) |           |           |
|------------------|------------------|----------------|-------------------------|-----------|-----------|
|                  |                  |                | X                       | Y         | Z         |
| 1                | 6                | 0              | 3.507185                | 0.867477  | -0.335994 |
| 2                | 6                | 0              | 2.157621                | 1.187537  | -0.240057 |
| 3                | 6                | 0              | 1.735630                | 2.493975  | -0.289615 |
| 4                | 6                | 0              | 2.703944                | 3.483930  | -0.438990 |
| 5                | 6                | 0              | 4.048234                | 3.171170  | -0.535321 |
| 6                | 6                | 0              | 4.458184                | 1.841445  | -0.482190 |
| 7                | 1                | 0              | 0.701154                | 2.755546  | -0.213024 |
| 8                | 1                | 0              | 2.394162                | 4.509049  | -0.478612 |
| 9                | 1                | 0              | 4.773207                | 3.950817  | -0.649263 |
| 10               | 1                | 0              | 5.495720                | 1.583847  | -0.554769 |
| 11               | 6                | 0              | 3.652356                | -0.616730 | -0.242022 |
| 12               | 8                | 0              | 4.214453                | -1.202780 | -1.407668 |
| 13               | 6                | 0              | 4.850179                | -2.453586 | -0.994639 |
| 14               | 6                | 0              | 5.377949                | -2.093323 | 0.399287  |
| 15               | 1                | 0              | 4.108813                | -3.233259 | -0.947855 |
| 16               | 1                | 0              | 5.622371                | -2.682754 | -1.706690 |
| 17               | 1                | 0              | 5.354999                | -2.919528 | 1.087666  |
| 18               | 1                | 0              | 6.361553                | -1.655895 | 0.353859  |
| 19               | 6                | 0              | 2.195539                | -1.092527 | -0.063954 |
| 20               | 8                | 0              | 1.820080                | -2.236257 | 0.069577  |
| 21               | 6                | 0              | -0.029463               | -0.057389 | 0.099360  |
| 22               | 1                | 0              | -0.376837               | -1.023268 | -0.237860 |
| 23               | 1                | 0              | -0.532547               | 0.708218  | -0.470058 |
| 24               | 6                | 0              | -3.852389               | 0.013954  | 1.284998  |
| 25               | 6                | 0              | -4.970896               | -0.082139 | 0.347067  |
| 26               | 6                | 0              | -6.268782               | -0.030244 | 0.853069  |
| 27               | 6                | 0              | -4.780846               | -0.224143 | -1.028049 |
| 28               | 6                | 0              | -7.361288               | -0.115988 | 0.019909  |
| 29               | 6                | 0              | -5.883535               | -0.310577 | -1.865272 |
| 30               | 6                | 0              | -7.159413               | -0.257076 | -1.348390 |
| 31               | 1                | 0              | -5.712618               | -0.419142 | -2.915770 |
| 32               | 6                | 0              | -0.341824               | 0.090210  | 1.582511  |
| 33               | 8                | 0              | 0.524050                | 0.202042  | 2.431572  |
| 34               | 8                | 0              | 4.430834                | -1.075969 | 0.860243  |
| 35               | 7                | 0              | 1.393720                | 0.012908  | -0.112124 |
| 36               | 7                | 0              | -1.656117               | 0.082147  | 1.905772  |
| 37               | 1                | 0              | -1.924277               | 0.172360  | 2.868312  |
| 38               | 7                | 0              | -2.640170               | -0.014553 | 0.918411  |
| 39               | 1                | 0              | -4.121434               | 0.112210  | 2.323647  |
| 40               | 1                | 0              | -8.000199               | -0.325181 | -2.009316 |
| 41               | 1                | 0              | -8.352800               | -0.074562 | 0.421296  |
| 42               | 1                | 0              | -6.410071               | 0.078943  | 1.910779  |
| 43               | 8                | 0              | -3.546218               | -0.284121 | -1.599243 |
| 44               | 1                | 0              | -2.839134               | -0.220101 | -0.932841 |

### Compound 3 (*trans*)

| Center<br>Number | Atomic<br>Number | Atomic<br>Type | Coordinates (Angstroms) |           |           |
|------------------|------------------|----------------|-------------------------|-----------|-----------|
|                  |                  |                | X                       | Y         | Z         |
| 1                | 6                | 0              | 3.535873                | -0.205127 | -0.604223 |
| 2                | 6                | 0              | 2.829985                | -1.248012 | -0.015891 |
| 3                | 6                | 0              | 3.086841                | -2.555312 | -0.344956 |
| 4                | 6                | 0              | 4.085459                | -2.801139 | -1.285192 |
| 5                | 6                | 0              | 4.794474                | -1.768708 | -1.871991 |
| 6                | 6                | 0              | 4.515406                | -0.447987 | -1.529111 |
| 7                | 1                | 0              | 2.540612                | -3.364951 | 0.091118  |
| 8                | 1                | 0              | 4.302051                | -3.814686 | -1.556893 |
| 9                | 1                | 0              | 5.556412                | -1.984209 | -2.592585 |
| 10               | 1                | 0              | 5.055521                | 0.361450  | -1.977310 |
| 11               | 6                | 0              | 3.022224                | 1.090190  | -0.061429 |
| 12               | 8                | 0              | 4.002526                | 1.844769  | 0.631302  |
| 13               | 6                | 0              | 3.592913                | 3.248547  | 0.562766  |
| 14               | 6                | 0              | 2.941426                | 3.321358  | -0.823903 |
| 15               | 1                | 0              | 2.882370                | 3.451644  | 1.346071  |
| 16               | 1                | 0              | 4.475591                | 3.853995  | 0.661373  |
| 17               | 1                | 0              | 2.107556                | 3.999336  | -0.864841 |
| 18               | 1                | 0              | 3.660581                | 3.545392  | -1.593906 |
| 19               | 6                | 0              | 1.919108                | 0.631034  | 0.913607  |
| 20               | 8                | 0              | 1.186924                | 1.344201  | 1.577404  |
| 21               | 6                | 0              | 1.044203                | -1.501987 | 1.804243  |
| 22               | 1                | 0              | 1.002324                | -0.989678 | 2.755451  |
| 23               | 1                | 0              | 1.466689                | -2.481163 | 1.943945  |
| 24               | 6                | 0              | -2.970371               | 0.563303  | 0.497285  |
| 25               | 6                | 0              | -4.326744               | 0.547539  | -0.055539 |
| 26               | 6                | 0              | -5.023511               | 1.746891  | -0.175616 |
| 27               | 6                | 0              | -4.935097               | -0.643867 | -0.462684 |
| 28               | 6                | 0              | -6.301610               | 1.779846  | -0.688560 |
| 29               | 6                | 0              | -6.223095               | -0.604620 | -0.978634 |
| 30               | 6                | 0              | -6.898844               | 0.591135  | -1.090678 |
| 31               | 1                | 0              | -6.671805               | -1.526560 | -1.284564 |
| 32               | 6                | 0              | -0.368648               | -1.662913 | 1.251696  |
| 33               | 8                | 0              | -0.850792               | -2.741848 | 0.965185  |
| 34               | 8                | 0              | 2.443547                | 1.958234  | -1.029824 |
| 35               | 7                | 0              | 1.889078                | -0.727693 | 0.903239  |
| 36               | 7                | 0              | -1.025095               | -0.481714 | 1.142502  |
| 37               | 1                | 0              | -0.593883               | 0.387647  | 1.407022  |
| 38               | 7                | 0              | -2.308732               | -0.507492 | 0.615577  |
| 39               | 1                | 0              | -2.577221               | 1.521805  | 0.792758  |
| 40               | 1                | 0              | -7.892764               | 0.600146  | -1.491671 |
| 41               | 1                | 0              | -6.826796               | 2.708740  | -0.775773 |
| 42               | 1                | 0              | -4.549453               | 2.656539  | 0.139240  |
| 43               | 8                | 0              | -4.322914               | -1.856363 | -0.378216 |
| 44               | 1                | 0              | -3.418806               | -1.780117 | -0.002597 |

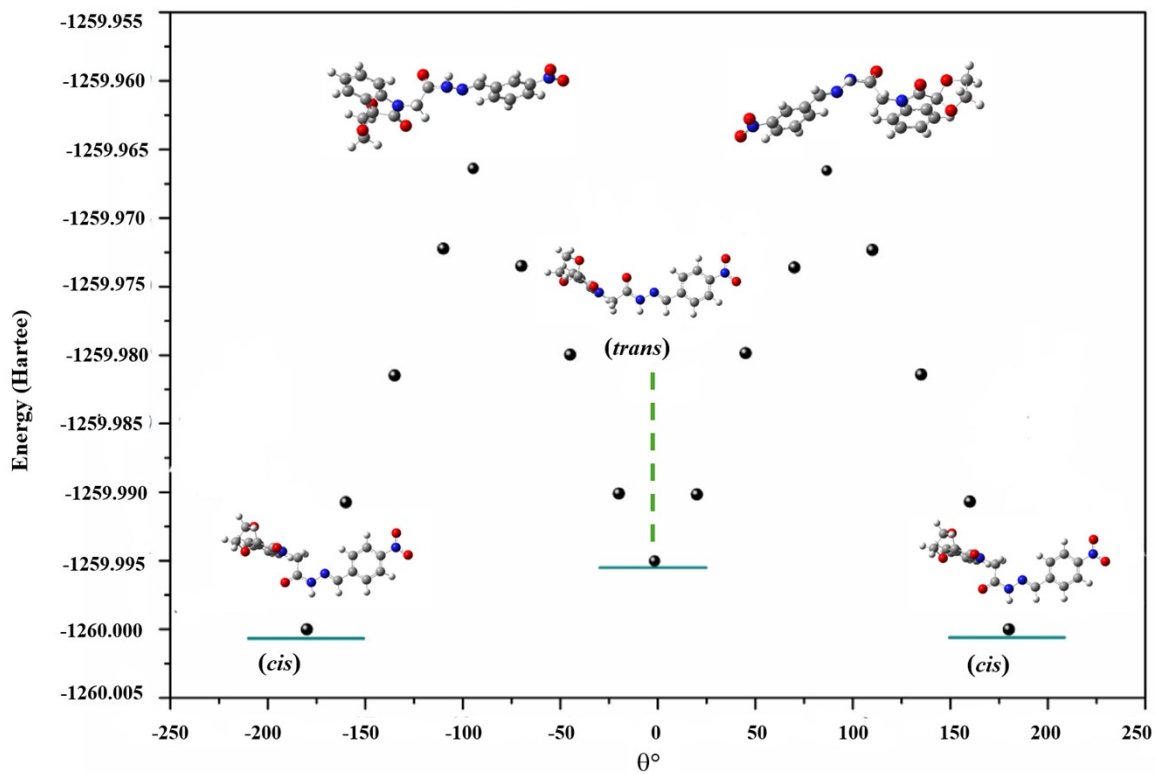

Fig. S6: PES scan of compound 2

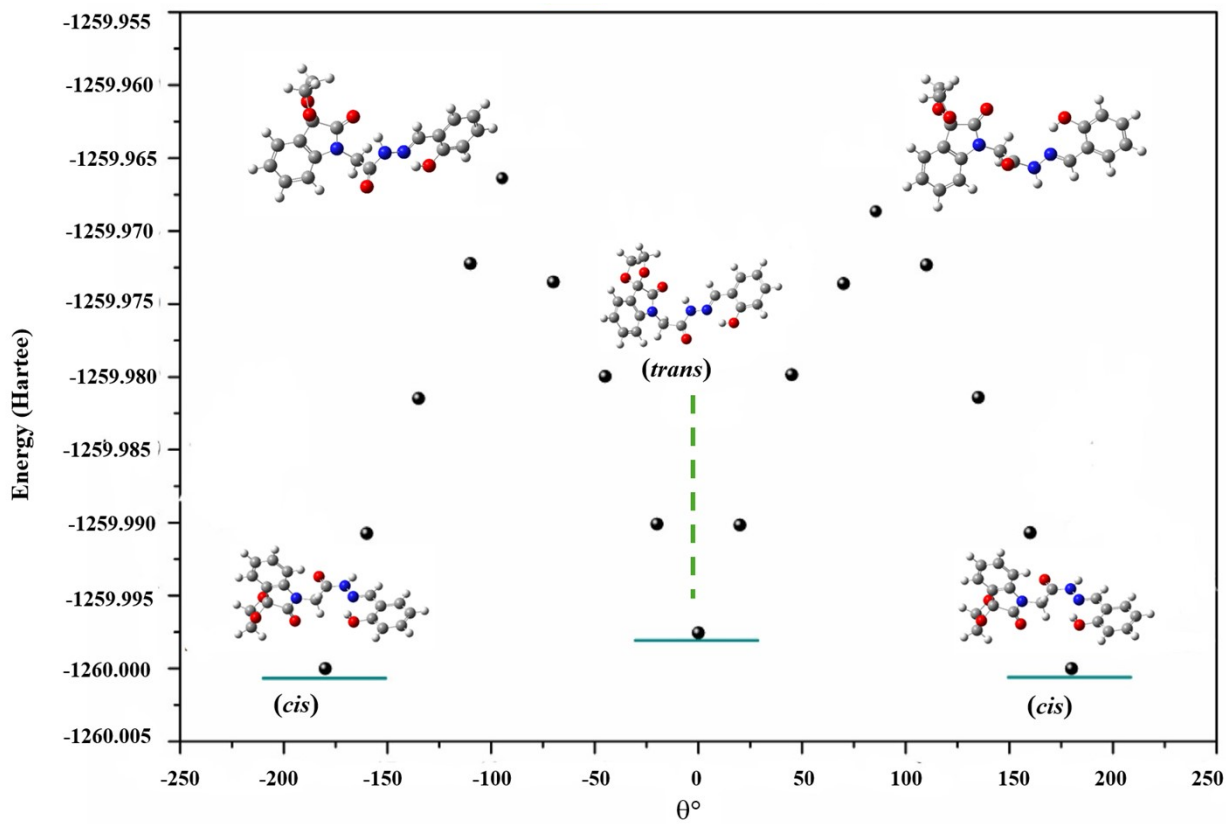

Fig. S7: PES scan of compound 3

## References:

1. M. M. Naseer, M. Hussain, A. Bauzá, K. M. Lo and A. Frontera, Intramolecular noncovalent carbon bonding interaction stabilizes the *cis* conformation in acylhydrazones, *ChemPlusChem*, 2018, **83**, 881-885.

# Copies of LC-MS Spectra (1-3)

1:

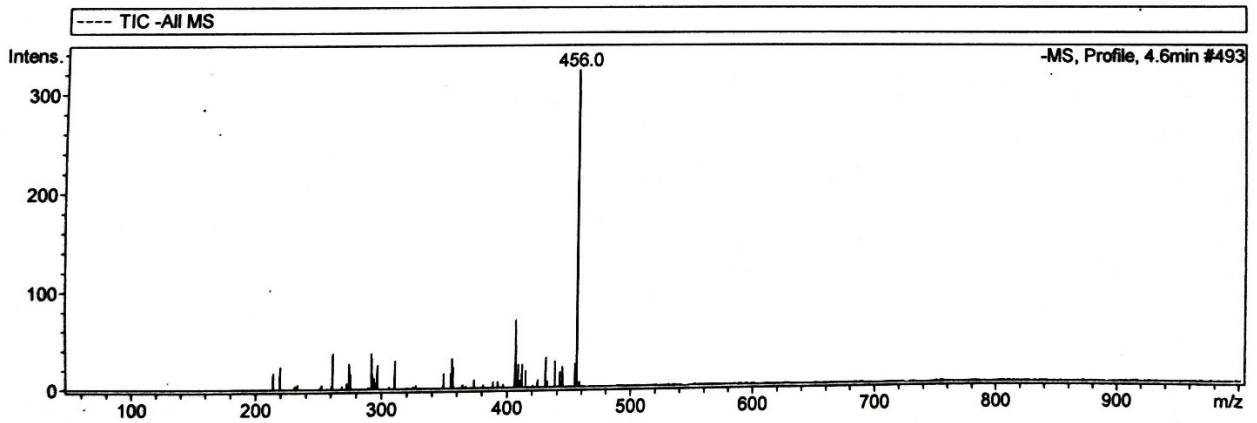

2:

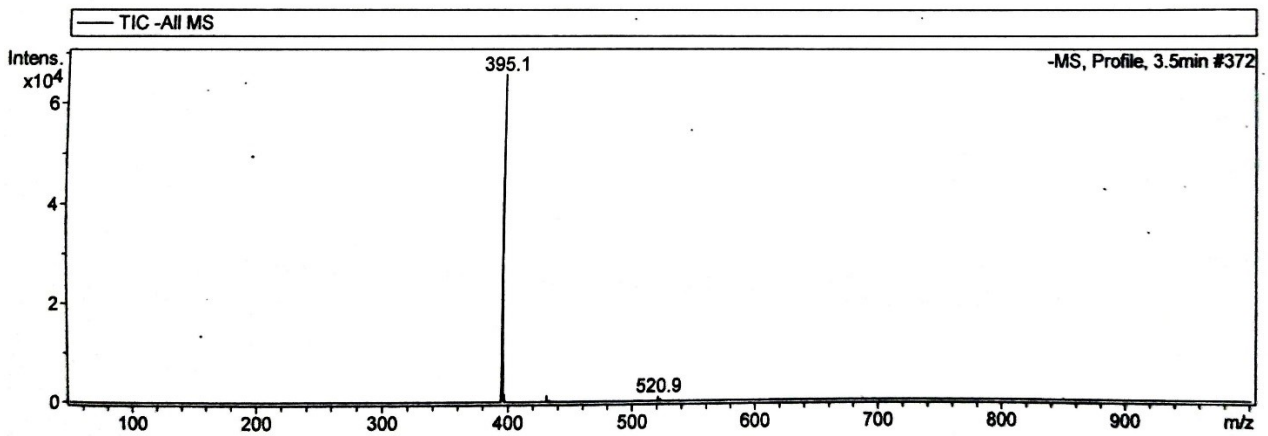

3:

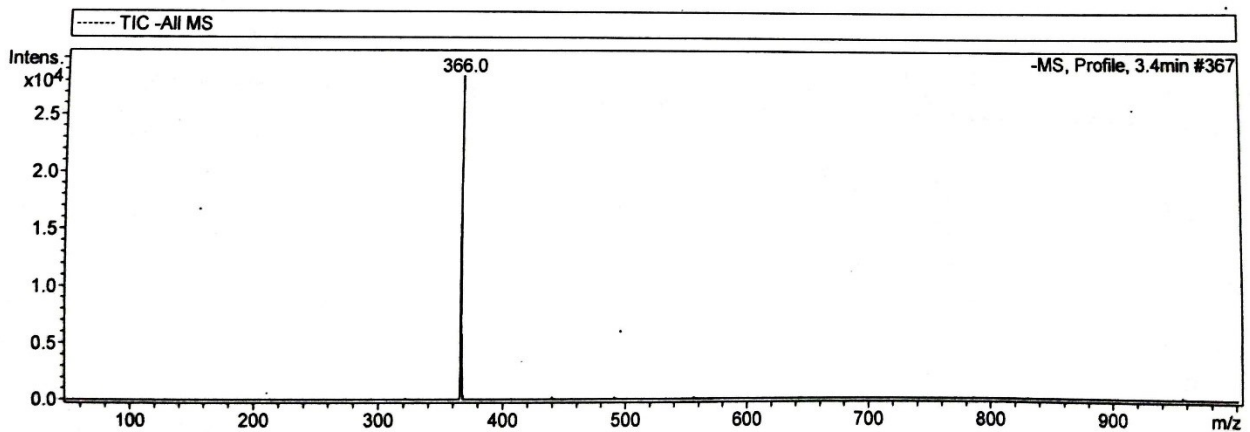

Supplement: d4ra08086f1.pdf [file d4ra08086f1.pdf]
